# Supplementary material for: Identifying MMP14 and COL12A1 as a potential combination of prognostic biomarkers in pancreatic ductal adenocarcinoma using integrated bioinformatics analysis
Source: PeerJ journal article supplement (doi:10.7717/peerj.10419), 2020-11-23

# Overall Survival

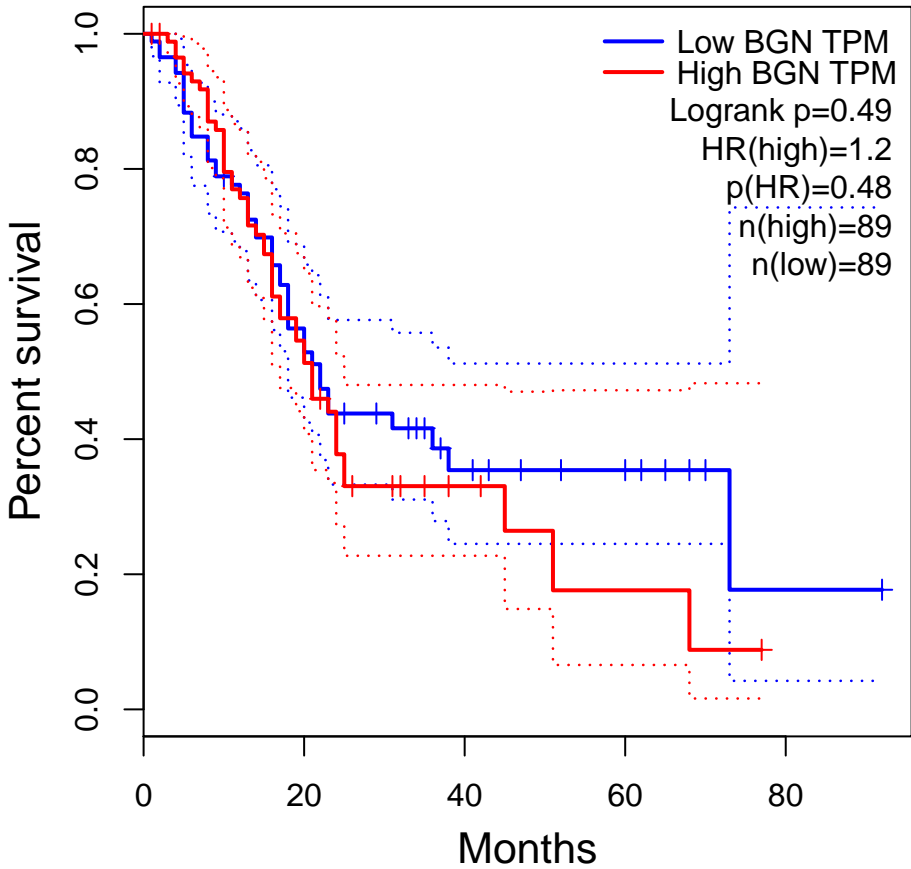

Supplement: BGN_survival_5Fm6v.pdf [file BGN_survival_5Fm6v.pdf]
