# Supplementary material for: Identifying MMP14 and COL12A1 as a potential combination of prognostic biomarkers in pancreatic ductal adenocarcinoma using integrated bioinformatics analysis
Source: PeerJ journal article supplement (doi:10.7717/peerj.10419), 2020-11-23
Supplement: CXCL12_boxplot_Ce1Hw.pdf [file CXCL12_boxplot_Ce1Hw.pdf]

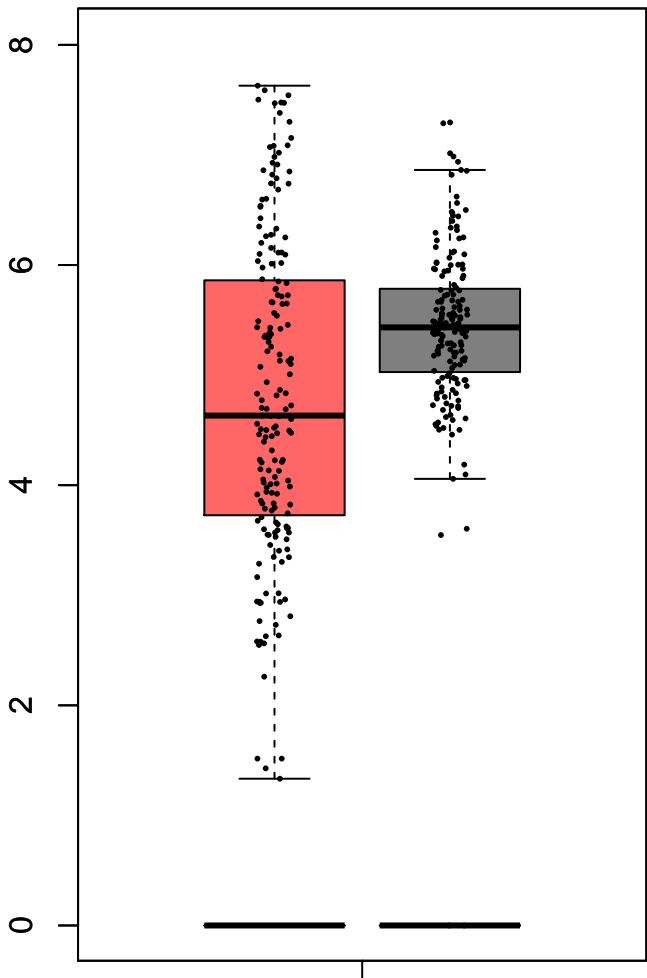

PAAD  
(num(T)=179; num(N)=171)
